# Supplementary material for: LsaYAB7, A Homologous Gene of FILAMENTOUS FLOWER, Participating In The Regulation of Adaxial-Abaxial Polarity of Leaves In Lettuce
Source: Research Square preprint supplement (doi:10.21203/rs.3.rs-453206/v1), 2021-06-02
Supplement: Supplementary file 1 [file e1474572c592b0d570ee2efc.xlsx]

## Sheet: Primer
Table S1. The sequences of Primers used in this study
Primers	Sequence
BD-LsaYAB7-full length-F	CATGGAGGCCGAATTCATGTCATCTTCAGCTGCTTT
BD-LsaYAB7-full length-R	GCAGGTCGACGGATCCTCAGTAAGGCGAAACACCCA
pSAT6-EGFP-LsaYAB7-F	GAGCTCAAGCTTCGAATTCATGTCATCTTCAGCTGCTTT
pSAT6-EGFP-LsaYAB7-R	GCCCGCGGTACCGTCGACGGTAAGGCGAAACACCCACAT
pEZR(K)-LC-LsaYAB7-F	CACGCTCGAGCTCAAGCTTATGTCATCTTCAGCTGCTTT
pEZR(K)-LC-LsaYAB7-R	TCGCGGCCCCGGTGGATCCTCAGTAAGGCGAAACACCCA
qRT-PCR-actin F	AGGCTGTGCTTTCTTTGT
qRT-PCR-actin R	TCTTCATTAGGGAATCTGTG
qRT-PCR-LsaYAB7-F	AAATGAGCCGGTTACTCCTG
qRT-PCR-LsaYAB7-R	GTTTCCTGCTTTGATACGTTGG
pBI121-GUS-LsaYAB7-F	GCTATGACCATGATTACGCCAAGCTTTGCATTCAAATGACGTCTTC
pBI121-GUS-LsaYAB7-R	ATAAGGGACTGACCACCCGGGGATCCGTTTTTCCTCACCTTTGCC
